# Supplementary material for: Associating Genes and Protein Complexes with Disease via Network Propagation
Source: PLOS journal article supplement (doi:10.1371/journal.pcbi.1000641), 2010-01-14
Supplement: S7 (10.1371/journal.pcbi.1000641.s007) [file journal.pcbi.1000641.s007]

| Disease (OMIM) | Causal gene (Entrez) | PRINCE    | Random Walk | CIPHER    |
|----------------|----------------------|-----------|-------------|-----------|
| 300600         | CACNA1F (778)        | <b>1</b>  | <b>1</b>    | 5         |
| 150230         | EXT1 (2131)          | <b>1</b>  | <b>1</b>    | <b>1</b>  |
| 300048         | FLNA (2316)          | 12        | 3           | <b>1</b>  |
| 311070         | PRPS (5631)          | 13        | <b>7</b>    | 24        |
| 301835         | PRPS (5631)          | 12        | <b>8</b>    | 20        |
| 609923         | TOPORS (10210)       | 35        | 39          | <b>33</b> |
| 601493         | LDB3 (11155)         | <b>8</b>  | 9           | 67        |
| 610448         | TREX1 (11277)        | <b>8</b>  | 10          | <b>8</b>  |
| 610448         | TREX1 (11277)        | <b>3</b>  | 5           | 17        |
| 604432         | TTBK2 (146057)       | <b>69</b> | 98          | 74        |

**Table S1.** Comparison of the ranking given by PRINCE, Random Walk and CIPHER to recently discovered causal genes for ten diseases for which no causal gene was known at the inception of this research. The best ranking for each disease is emphasized.
