# Supplementary material for: Associating Genes and Protein Complexes with Disease via Network Propagation
Source: PLOS journal article supplement (doi:10.1371/journal.pcbi.1000641), 2010-01-14
Supplement: S9 (10.1371/journal.pcbi.1000641.s009) [file journal.pcbi.1000641.s009]

| Beta | #Predicted complexes | GO enrichment (%) | Expression coherency (%) | Conservation coherency (%) |
|------|----------------------|-------------------|--------------------------|----------------------------|
| 0.8  | 549                  | 93.75             | 40                       | 10                         |
| 0.85 | 558                  | <b>95</b>         | <b>45</b>                | 12.5                       |
| 0.9  | 566                  | <b>95</b>         | 43.75                    | <b>17.5</b>                |
| 0.95 | 565                  | 93.75             | 41.25                    | 15                         |

**Table S3.** Comparing the effect of different values of beta on the inferred complexes, in terms of functional enrichment, conservation coherency and expression coherency.
