# Supplementary material for: Associating Genes and Protein Complexes with Disease via Network Propagation
Source: PLoS Comput Biol. 2010 Jan 15;6(1):e1000641. doi: 10.1371/journal.pcbi.1000641 (PMC2797085; doi:10.1371/journal.pcbi.1000641)
Supplement: Table S2 — PRINCE's causal gene predictions for Prostate Cancer, Alzheimer's Disease and type 2 Diabetes. (0.04 MB XLS) [file pcbi.1000641.s008.xls]

## Sheet: Multifactorial diseases
Disease	MIM	Gene ID	Name	Rank	intervals rank	GAD	SANGER	Genecards	Literature	Proof	Relevant link
Prostate Cancer	176807	4683	NBN	1		1	0	0	1	TRUE	http://www.biomedcentral.com/1471-2407/9/181 , http://ghr.nlm.nih.gov/gene=nbn
Prostate Cancer	176807	83990	BRIP1	2		0	0	0	1	TRUE	http://www.ncbi.nlm.nih.gov/pubmed/19127258
Prostate Cancer	176807	5979	RET	3	1	0	0	0	1	TRUE	http://www.ncbi.nlm.nih.gov/pubmed/9539247
Prostate Cancer	176807	672	BRCA1	4		0	0	1	1	TRUE	http://www.ncbi.nlm.nih.gov/pubmed/11405179
Prostate Cancer	176807	23598	PATZ1	5		0	0	1	1	TRUE	http://www.ncbi.nlm.nih.gov/sites/entrez?db=pubmed&cmd=search&term=11839683&dopt=b
Prostate Cancer	176807	10111	RAD50	6		0	0	0	0	FALSE
Prostate Cancer	176807	7157	TP53	7		1	1	0	1	TRUE	http://www.ncbi.nlm.nih.gov/pubmed/18552821, http://www.ncbi.nlm.nih.gov/pubmed/12824702?dopt=Abstract
Prostate Cancer	176807	4361	MRE11A	8		0	0	0	0	FALSE
Prostate Cancer	176807	472	ATM	9		1	0	0	1	TRUE	http://www.ncbi.nlm.nih.gov/pubmed/15280931?dopt=Abstract
Prostate Cancer	176807	1029	CDKN2A	10		0	1	0	1	TRUE	http://www.ncbi.nlm.nih.gov/pubmed/9171999?dopt=Abstract
Prostate Cancer	176807	2778	GNAS		2	0	0	0	?	FALSE	http://www.pubmedcentral.nih.gov/articlerender.fcgi?artid=1287105
Prostate Cancer	176807	9156	EXO1		3	0	0	0	?	FALSE	http://jmg.bmj.com/cgi/content/full/40/3/e19
Prostate Cancer	176807	5395	PMS2		4	0	0	0	1	TRUE	http://www.ncbi.nlm.nih.gov/pubmed/12684669
Prostate Cancer	176807	5447	POR		5	0	0	0	0	FALSE
Prostate Cancer	176807	898	CCNE1		6	0	0	1	1	TRUE	http://content.karger.com/ProdukteDB/produkte.asp?Aktion=ShowPDF&ProduktNr=224272&Ausgabe=228686&ArtikelNr=65998
Prostate Cancer	176807	4534	MTM1		7	0	0	0	0	FALSE
Prostate Cancer	176807	655	BMP7		8	0	0	0	1	TRUE	http://www.ncbi.nlm.nih.gov/pubmed/16126463 http://www.ncbi.nlm.nih.gov/sites/entrez?db=pubmed&cmd=search&term=17724140&dopt=b
Prostate Cancer	176807	2316	FLNA		9	0	0	0	1	TRUE	http://www.ncbi.nlm.nih.gov/sites/entrez?db=pubmed&cmd=search&term=17420725&dopt=b
Prostate Cancer	176807	2990	GUSB		10	0	0	0	0	FALSE
					out of 851 candidates
Alzheimer Disease	104300	3028	HSD17B10	1		0	-	1	1	TRUE	http://www.ncbi.nlm.nih.gov/pubmed/18765932?ordinalpos=1&itool=EntrezSystem2.PEntrez.Pubmed.Pubmed_ResultsPanel.Pubmed_DefaultReportPanel.Pubmed_RVDocSum
Alzheimer Disease	104300	25825	BACE2	2		1	-	1	1	TRUE	http://www.ncbi.nlm.nih.gov/pubmed/16023140
Alzheimer Disease	104300	10307	APBB3	3		1	-	1	1	TRUE	http://www.ncbi.nlm.nih.gov/sites/entrez?db=pubmed&cmd=search&term=12402277&dopt=b
Alzheimer Disease	104300	323	APBB2	4		1	-	1	1	TRUE	http://www.ncbi.nlm.nih.gov/sites/entrez?db=pubmed&cmd=search&term=18852029&dopt=b
Alzheimer Disease	104300	3032	HADHB	5		0	-	0	0	FALSE
Alzheimer Disease	104300	8883	NAE1	7		0	-	1	1	TRUE	http://www.ncbi.nlm.nih.gov/sites/entrez?db=pubmed&cmd=search&term=14557245&dopt=b
Alzheimer Disease	104300	334	APLP2	8		0	-	1	1	TRUE	http://www.nature.com/ng/journal/v5/n1/abs/ng0993-95.html
Alzheimer Disease	104300	642	BLMH	9		1	-	1	1	TRUE	http://www.ncbi.nlm.nih.gov/pubmed/12604387
Alzheimer Disease	104300	322	APBB1	10		1	-	1	1	TRUE	http://www.ncbi.nlm.nih.gov/sites/entrez?db=pubmed&cmd=search&term=9799084&dopt=b
Alzheimer Disease	104300	2161	F12	11		0	-	0	1	TRUE	http://www.ncbi.nlm.nih.gov/pubmed/7987673
Alzheimer Disease	104300	1191	CLU		1	0	-	1	1	TRUE	http://www.ncbi.nlm.nih.gov/pubmed/16490286
Alzheimer Disease	104300	2597	GAPDH		2	1	-	1	1	TRUE	http://www.ncbi.nlm.nih.gov/pubmed/16186172
Alzheimer Disease	104300	5621	PRNP		3	1	-	0	1	TRUE	http://www.ncbi.nlm.nih.gov/pubmed/15258222?dopt=Abstract
Alzheimer Disease	104300	1020	CDK5		4	0	-	1	1	TRUE	http://www.ncbi.nlm.nih.gov/sites/entrez?db=pubmed&cmd=search&term=15917097&dopt=b
Alzheimer Disease	104300	22918	CD93		5	0	-	0	1	TRUE	http://www.ncbi.nlm.nih.gov/pubmed/8593893?ordinalpos=1&itool=EntrezSystem2.PEntrez.Pubmed.Pubmed_ResultsPanel.Pubmed_DefaultReportPanel.Pubmed_RVDocSum
Alzheimer Disease	104300	5096	PCCB		6	0	-	0	0	FALSE
Alzheimer Disease	104300	1471	CST3		7	1	-	0	1	TRUE	http://www.ncbi.nlm.nih.gov/pubmed/10993992?dopt=Abstract
Alzheimer Disease	104300	7486	WRN		8	0	-	0	0	FALSE	http://iospress.metapress.com/content/vn99nag51brcj32l/
Alzheimer Disease	104300	6464	SHC1		9	0	-	0	0	FALSE	http://bioinformatics.oxfordjournals.org/cgi/content/full/21/1/104
Alzheimer Disease	104300	427	ASAH1		10	0	-	0	1	TRUE	http://www3.interscience.wiley.com/journal/118791403/abstract
					out of 786 candidates
NID Diabetes Milletus	125853	6927	HNF1A	1		1	-	1	1	TRUE	http://www.ncbi.nlm.nih.gov/pubmed/16046299?dopt=Abstract
NID Diabetes Milletus	125853	389692	MAFA	2		0	-	1	1	TRUE	http://www.ncbi.nlm.nih.gov/pubmed/17938503?ordinalpos=5&itool=EntrezSystem2.PEntrez.Pubmed.Pubmed_ResultsPanel.Pubmed_DefaultReportPanel.Pubmed_RVDocSum
NID Diabetes Milletus	125853	26580	BSCL2	3		0	-	1	1	TRUE	http://www.ncbi.nlm.nih.gov/pubmed/19574402
NID Diabetes Milletus	125853	6514	SLC2A2	4		1	-	1	1	TRUE	http://www.ncbi.nlm.nih.gov/sites/entrez?db=pubmed&cmd=search&term=7593414
NID Diabetes Milletus	125853	3172	HNF4A	5	1	1	-	1	1	TRUE	http://www.ncbi.nlm.nih.gov/sites/entrez?db=pubmed&cmd=search&term=9267996&dopt=b
NID Diabetes Milletus	125853	5350	PLN	6		0	-	0	1	?	http://www.sciencedirect.com/science?_ob=ArticleURL&_udi=B6WK6-4K4DFXR-5P&_user=48161&_rdoc=1&_fmt=&_orig=search&_sort=d&_docanchor=&view=c&_searchStrId=966706405&_rerunOrigin=google&_acct=C000005078&_version=1&_urlVersion=0&_userid=48161&md5=e7d97efc194f836acf82f8e6d7f09919
NID Diabetes Milletus	125853	3375	IAPP	7		1	-	1	1	TRUE	http://www.ncbi.nlm.nih.gov/sites/entrez?db=pubmed&cmd=search&term=9589246
NID Diabetes Milletus	125853	4760	NEUROD1	8		1	-	1	1	TRUE	http://www.ncbi.nlm.nih.gov/pubmed/17440689
NID Diabetes Milletus	125853	140628	GATA5	9		0	-	0	1	TRUE	http://www.ncbi.nlm.nih.gov/pubmed/19590847
NID Diabetes Milletus	125853	9175	MAP3K13	10		0	-	0	0	FALSE	Interacts with an niddm causal gene.
NID Diabetes Milletus	125853	808	CALM3		2	0	-	0	0	FALSE	In insulin pathway
NID Diabetes Milletus	125853	1760	DMPK		3	0	-	0	1	TRUE	http://www.plosone.org/article/info:doi/10.1371/journal.pone.0001134
NID Diabetes Milletus	125853	7529	YWHAB		4	0	-	0	0	FALSE
NID Diabetes Milletus	125853	348	APOE		5	1	-	1	1	TRUE	http://www.ncbi.nlm.nih.gov/pubmed/10489223
NID Diabetes Milletus	125853	2068	ERCC2		6	0	-	0	0	FALSE
NID Diabetes Milletus	125853	344	APOC2		7	0	-	0	0	FALSE
NID Diabetes Milletus	125853	8202	NCOA3		8	0	-	0	0	FALSE
NID Diabetes Milletus	125853	1051	CEBPB		9	0	-	0	1	TRUE	http://www.biomedcentral.com/1471-2164/9/310
NID Diabetes Milletus	125853	5770	PTPN1		10	1	-	1	1	TRUE	http://www.ncbi.nlm.nih.gov/pubmed/11756316
					out of 282 candidates

## Sheet: README
This spreadsheet contains PRINCE's predictions for three complex diseases. Each row represents a distinct prediction.
LEGEND
Field name	Description
Disease	Name of the disease
MIM	The OMIM unique ID for the disease.
Gene ID	Entrez GeneID for the predicted causal gene.
Name	Official name of the predicted causal gene.
Rank	The gene's rank within all of the genes composing the PPI network (9998 overall).
Interval rank	The gene's rank among the genes residing within all of the intervals associated with the disease for which the actual gene was not identified. (if applicable).
GAD	1 if the Gene appear to be associated to the diseases in the Genetic Association Database. 0 Otherwise.
SANGER	For Prostate Cancer - 1 if the gene was found to be associated with Prostate Cancer according to the Sanger Wellcome Trust's Cancer Genome project databases. 0 otherwise
Genecards	1 if the Gene appear to be associated to the disease according to its gene sheet in the Genecards database. 0 Otherwise.
Literature	1 if we found evidence in scientific literature that associated the gene with the disease. 0 if we were unable to find such evidence. ? Means that the evidence found by us is inconclusive.
Proof	Our labeling of the prediction as True Positive or False Positive according to the previous four fields.
Relevant link	If applicable, a link to an abstract of a paper linking the gene to the disease.
